# Supplementary material
Source: PubMed Central journal article supplement (PMC4746606)
Supplement: cr201613x1.pdf [file cr201613x1.pdf]

Figure S1

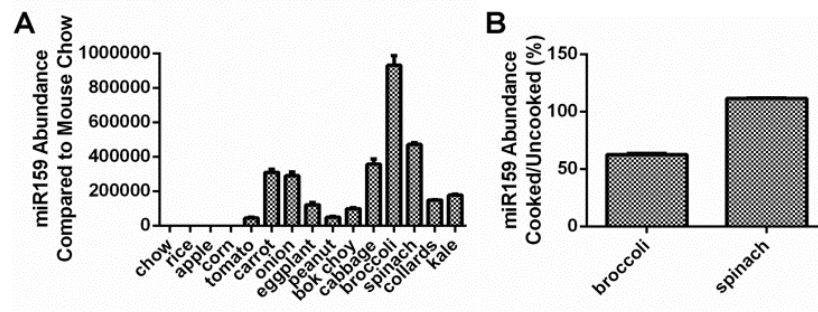

**Figure S1** miR159 abundance in common foods. **(A)** qPCR for miR159 from RNA extracted from an equal weight of common foods normalized to mouse chow. **(B)** qPCR for miR159 from foods that were boiled in water for 10 (spinach) or 25 (broccoli) minutes normalized to unboiled foods.
