# Supplementary material
Source: PubMed Central journal article supplement (PMC4746606)
Supplement: cr201613x2.pdf [file cr201613x2.pdf]

Figure S2

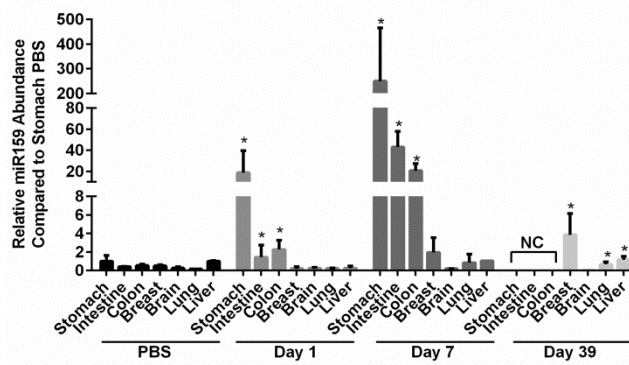

**Figure S2** Distribution of miR159 after oral gavage. qPCR for miR159 in the indicated tissues from NSG mice after 1, 7, or 39 days of daily oral gavage ( $n = 3, 3, 5$ ). Data was first normalized to the level of U6 and then plotted relative to the value of the first group (stomach PBS).  $*p < 0.05$  compared to the same tissue in the control group that has received PBS. NC, not checked due to lack of tissue availability.
